# Supplementary material for: A novel tetraazamacrocycle bearing a thiol pendant arm for labeling biomolecules with radiolanthanides
Source: Royal Society of Chemistry journal article supplement (doi:10.1039/b820375j), 2009-01-01
Supplement: b820375j.pdf [file b820375j.pdf]

## Supporting Information

### **Lanthanide Complexes with a New Tetraazamacrocyclic Containing Methylcarboxylate and Thiolate Pendant Arms**

Sara Lacerda<sup>1</sup>, M. Paula Campello<sup>1</sup>, Fernanda Marques<sup>1</sup>, Lurdes Gano<sup>1</sup>, Vojtěch Kubiček<sup>2</sup>, Petra Fousková<sup>2</sup>, Eva Toth<sup>2\*</sup> and Isabel Santos<sup>1,\*</sup>

<sup>1</sup> Departamento de Química, Instituto Tecnológico e Nuclear, Estrada Nacional 10, 2686-953 Sacavém, Portugal

<sup>2</sup> Centre de Biophysique Moléculaire, CNRS, Rue Charles-Sandron 45071 Orléans Cedex 2, France

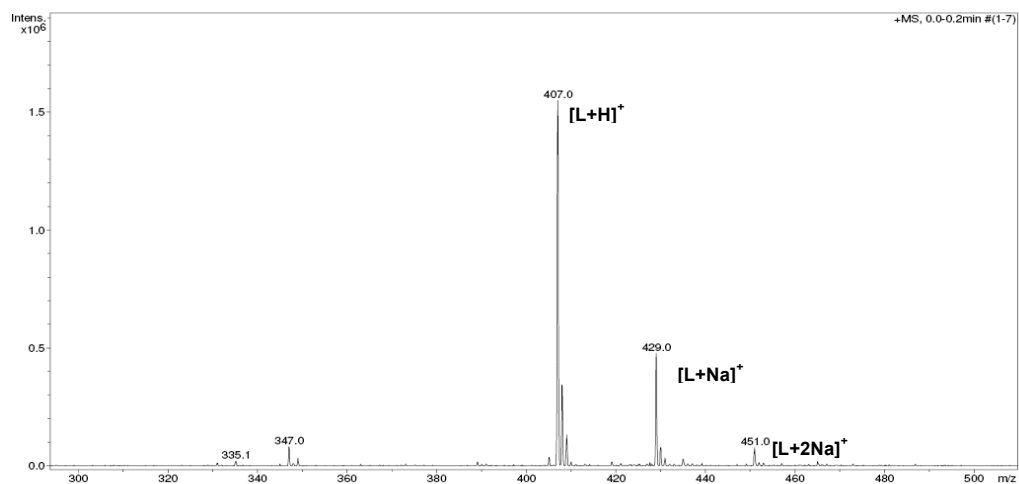

**Figure S1:** MS-spectrum of  $\text{H}_4\text{DO}_3\text{ASH}$  (positive mode).

The labeling yield decreases to 85% - 90% when the reactions are carried out at  $\text{pH} < 6$  and  $\text{pH} > 7$ , being these yields only achieved after at least 4h at room temperature. Figure S2 shows the pH dependence in the labelling of  $\text{H}_4\text{do3aSH}$  with  $^{153}\text{Sm}$  at pH 5, 6 and 9 (30 min reaction, room temperature) and figure S3 represents the kinetics of formation of  $^{153}\text{Sm}$ -do3aSH at pH 5 and at pH 9, both at room temperature.

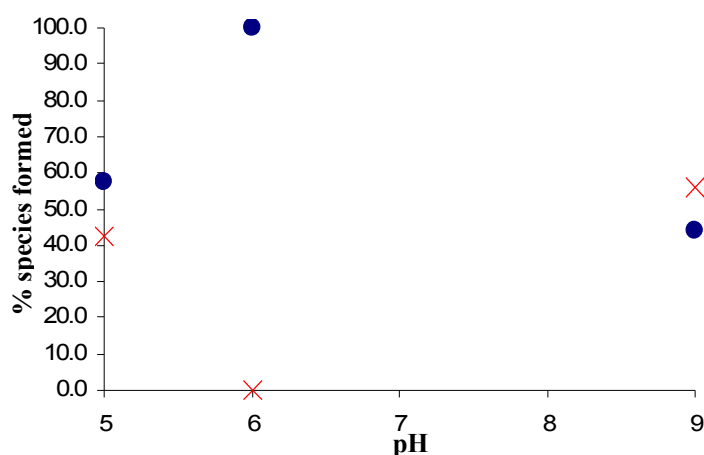

**Figure S2:** pH dependence in the labeling of do3aSH with  $^{153}\text{Sm}$  (30 min., room temperature):  $\times$   $^{153}\text{Sm}(\text{NO}_3)_3$ ,  $\bullet$   $^{153}\text{Sm}$ -do3aSH.

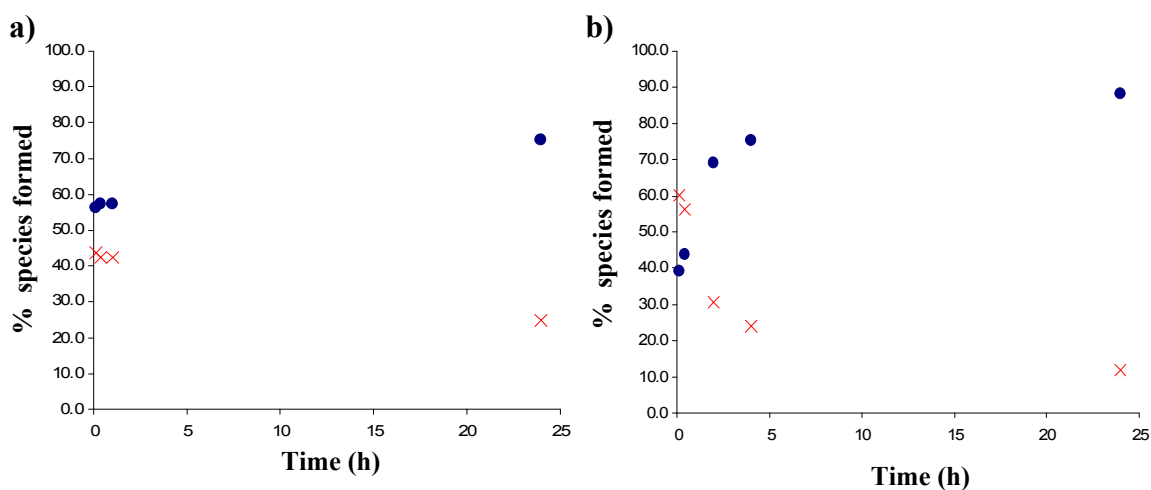

**Figure S3:** Kinetics of the labelling reaction at: (a) pH 5 and (b) pH 9 (room temperature):  $\times$   $^{153}\text{Sm}(\text{NO}_3)_3$ ,  $\bullet$   $^{153}\text{Sm}$ -do3aSH.

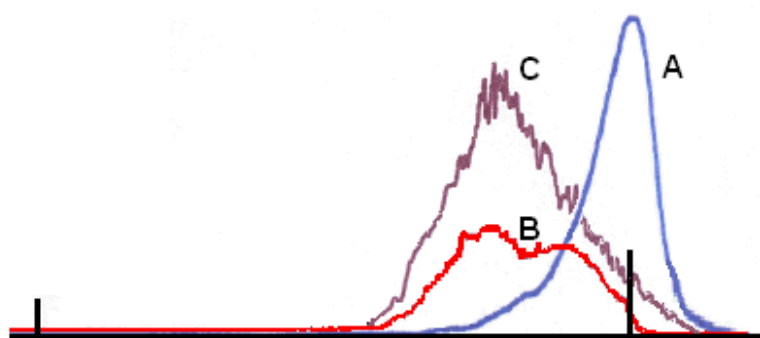

**Figure S4:**  $^{166}\text{Ho}$ -DO3ASH chromatographic profile: **A:** after labelling, **B:** in human serum, after 2 days, **C:** in human serum, after 3 days.
